# Supplementary material
Source: MDPI journal article supplement (https://www.mdpi.com/search?q=diversity-11-00037)

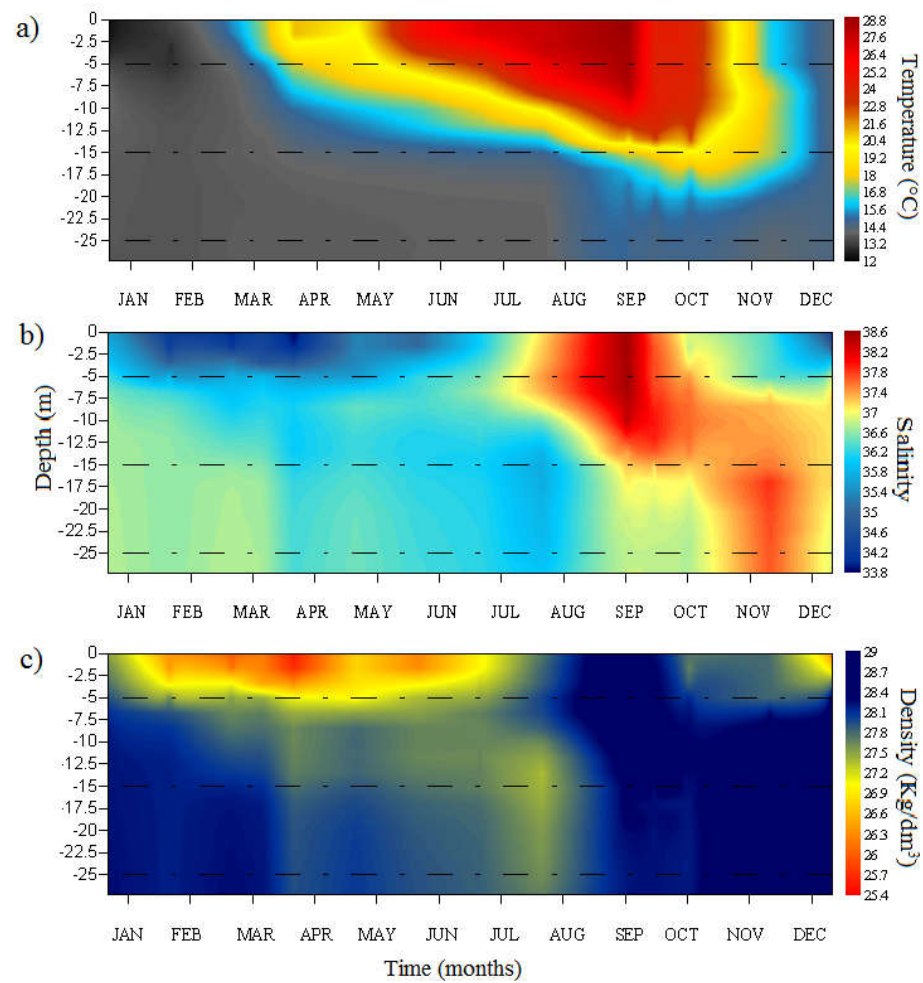

**Supplementary Figure S1.** Temperature (a), Salinity (b), Density (c) profiles during 2010 along the water column.

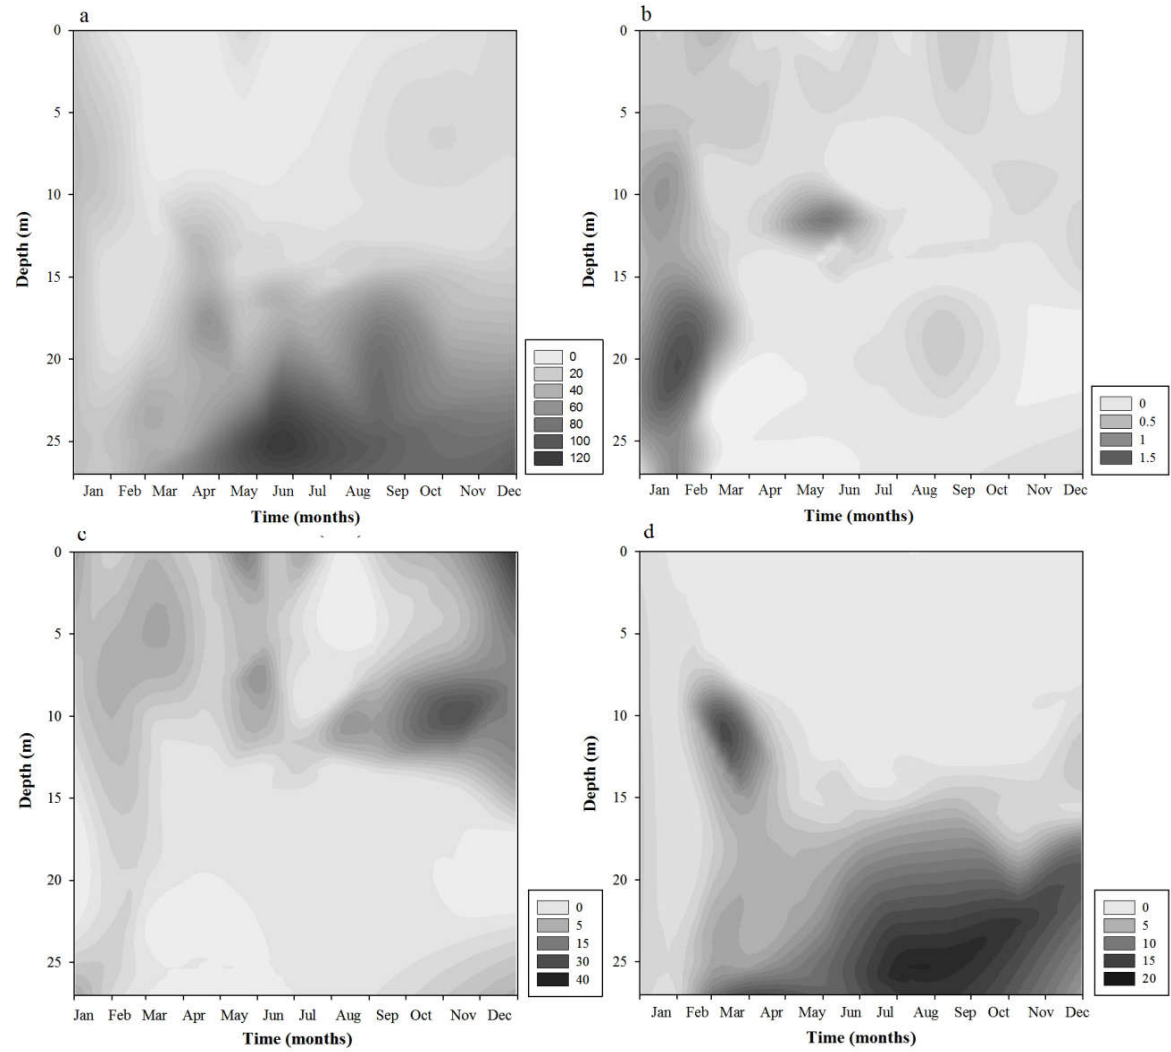

**Supplementary Figure S2.** Ammonia (uM) (a), Nitrites (uM) (b), Nitrates (uM) (c) and Phosphates (uM) (d) concentration during 2010 along the water column.

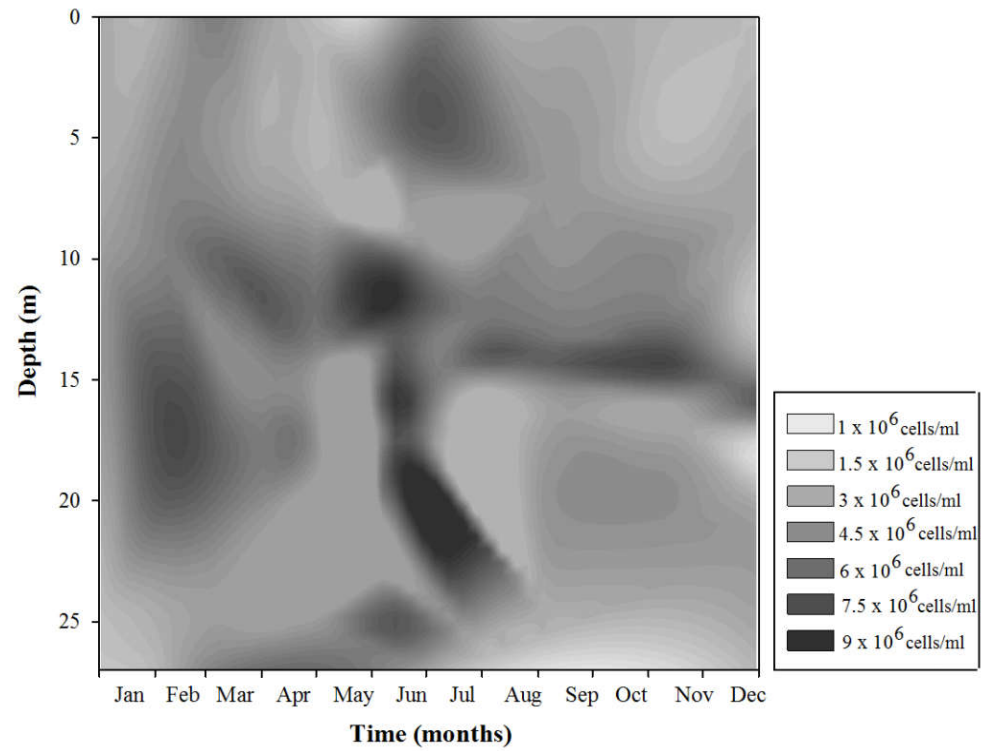

**Supplementary Figure S3.** Temporal and vertical variations of DAPI-stained cell abundance.

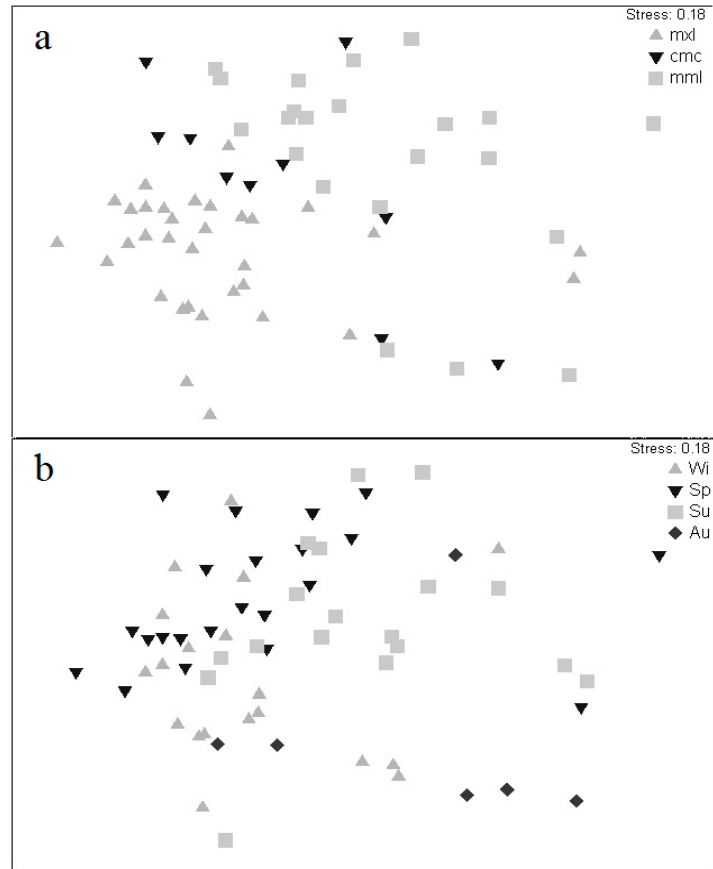

**Supplementary Figure S4.** Non-metric multidimensional scaling (nMDS) analysis permuted on ARISA results (Bray-Curtis similarity matrix): layer factor (a); season factor (b). mxl: mixolimnion; cmc: chemocline; mml: monimolimnion; Wi: winter; Sp: spring; Su: summer; Au: August.

**Supplementary Table S1.** List of 5-HRP labeled oligonucleotide probes used in this study.

| Probe     | Target group              | Probe sequence (5'-3') <sup>1</sup> | Reference | Remarks                               |
|-----------|---------------------------|-------------------------------------|-----------|---------------------------------------|
| EUB338I   | Most but not all Bacteria | GCTGCCTCCCGTAGGAGT                  | [39]      |                                       |
| EUB338II  | Planctomycetes            | GCAGCCACCCGTAGGTGT                  | [40]      |                                       |
| EUB338III | Verrucomicrobiales        | GCTGCCACCCGTAGGTGT                  | [40]      |                                       |
| ARCH915   | Archaea                   | GTGCTCCCCCGCCAATTCCT                | [41]      |                                       |
| ALF968    | Alphaproteobacteria       | GGTAAGGTTCTGCGCGTT                  | [42]      |                                       |
| BET42a    | Betaproteobacteria        | GCCTTCCCACCTTCGTTT                  | [43]      | Gam42a as competitor targets 23S rRNA |
| GAM42a    | Gammaproteobacteria       | GCCTTCCCACATCGTTT                   | [43]      | Bet42a as competitor targets 23S rRNA |
| DELTA495a | Some Deltaproteobacteria  | AGTTAGCCGGTGCTTCCT                  | [44]      |                                       |
| DELTA495b | Deltaproteobacteria       | AGTTAGCCGGCGCTTCCT                  | [44]      |                                       |
| DELTA495c | Deltaproteobacteria       | AATTAGCCGGTGCTTCCT                  | [44]      |                                       |
| EPS914    | Epsilonproteobacteria     | GGTCCCCGTCTATTCCTT                  | [45]      |                                       |
| CF319a    | Bacteroidetes             | TGGTCCGTGTCTCAGTAC                  | [46]      |                                       |
| NON338    | Negative control probe    | ACTCCTACGGGAGGCAGC                  | [47]      |                                       |

<sup>1</sup> Formamide concentration was 35% for all probes used in this study.

**Supplementary Table S2.** Diversity indices computed in this study *per* month and lake stratum.

|     | Layer | Taxa S | Margalef (Richness) d | Pielou (evenness) J' | Shannon (Diversity) H' | Shannon Max H' Max | Simpson (Dominance) D | Simpson Reciprocal 1/D |
|-----|-------|--------|-----------------------|----------------------|------------------------|--------------------|-----------------------|------------------------|
| Jan | mxl   | 88     | 19.00                 | 0.79                 | 3.55                   | 4.48               | 0.05                  | 21.14                  |
|     | mxl   | 91     | 19.64                 | 0.79                 | 3.55                   | 4.51               | 0.05                  | 19.71                  |
|     | mxl   | 107    | 23.29                 | 0.84                 | 3.95                   | 4.67               | 0.03                  | 30.92                  |
| Feb | mxl   | 87     | 18.86                 | 0.84                 | 3.77                   | 4.47               | 0.03                  | 29.48                  |
|     | mxl   | 84     | 18.19                 | 0.84                 | 3.73                   | 4.43               | 0.04                  | 26.58                  |
|     | mxl   | 109    | 23.60                 | 0.85                 | 4.00                   | 4.69               | 0.03                  | 33.80                  |
| Mar | mxl   | 91     | 19.74                 | 0.85                 | 3.84                   | 4.51               | 0.03                  | 33.34                  |
|     | cmc   | 102    | 22.16                 | 0.81                 | 3.74                   | 4.62               | 0.05                  | 22.05                  |
|     | mml   | 129    | 27.95                 | 0.83                 | 4.05                   | 4.86               | 0.03                  | 31.56                  |
| Apr | mxl   | 88     | 19.01                 | 0.84                 | 3.75                   | 4.48               | 0.04                  | 28.39                  |
|     | cmc   | 127    | 27.51                 | 0.84                 | 4.08                   | 4.84               | 0.03                  | 35.01                  |
|     | mml   | 134    | 29.14                 | 0.83                 | 4.06                   | 4.90               | 0.03                  | 34.55                  |
| May | mxl   | 105    | 22.73                 | 0.84                 | 3.93                   | 4.65               | 0.03                  | 30.30                  |
|     | cmc   | 117    | 25.46                 | 0.85                 | 4.06                   | 4.76               | 0.03                  | 34.79                  |
|     | mml   | 149    | 32.39                 | 0.84                 | 4.18                   | 5.00               | 0.03                  | 32.24                  |
| Jun | mxl   | 80     | 17.27                 | 0.84                 | 3.69                   | 4.38               | 0.04                  | 26.29                  |
|     | cmc   | 113    | 24.51                 | 0.83                 | 3.92                   | 4.73               | 0.03                  | 29.62                  |
|     | mml   | 148    | 32.14                 | 0.82                 | 4.07                   | 5.00               | 0.04                  | 27.09                  |
| Jul | mxl   | 115    | 25.00                 | 0.82                 | 3.88                   | 4.74               | 0.03                  | 28.97                  |
|     | cmc   | 95     | 20.53                 | 0.77                 | 3.52                   | 4.55               | 0.06                  | 18.04                  |
|     | mml   | 113    | 24.46                 | 0.78                 | 3.69                   | 4.73               | 0.05                  | 20.33                  |
| Aug | mxl   | 121    | 26.33                 | 0.86                 | 4.11                   | 4.80               | 0.03                  | 37.55                  |
|     | cmc   | 135    | 29.38                 | 0.81                 | 3.98                   | 4.91               | 0.04                  | 23.22                  |
|     | mml   | 103    | 22.21                 | 0.78                 | 3.59                   | 4.63               | 0.06                  | 16.04                  |
| Sep | mxl   | 88     | 19.02                 | 0.80                 | 3.56                   | 4.48               | 0.05                  | 20.70                  |
|     | cmc   | 96     | 20.65                 | 0.80                 | 3.64                   | 4.56               | 0.05                  | 20.14                  |
|     | mml   | 109    | 23.51                 | 0.78                 | 3.65                   | 4.69               | 0.06                  | 17.53                  |
| Oct | mxl   | 79     | 17.00                 | 0.83                 | 3.62                   | 4.37               | 0.04                  | 25.47                  |
|     | cmc   | 123,00 | 26.83                 | 0.80                 | 3.87                   | 4.81               | 0.04                  | 23.97                  |
|     | mml   | 141,00 | 30.67                 | 0.84                 | 4.14                   | 4.95               | 0.03                  | 32.42                  |
| Nov | mxl   | 93     | 19.99                 | 0.86                 | 3.89                   | 4.53               | 0.03                  | 29.00                  |
|     | cmc   | 61     | 13.03                 | 0.58                 | 2.40                   | 4.11               | 0.28                  | 3.63                   |
|     | mml   | 88     | 18.91                 | 0.76                 | 3.39                   | 4.48               | 0.06                  | 15.63                  |
| Dec | mxl   | 104    | 22.60                 | 0.83                 | 3.87                   | 4.64               | 0.04                  | 28.20                  |
|     | cmc   | 88     | 18.99                 | 0.75                 | 3.37                   | 4.48               | 0.06                  | 17.18                  |
|     | mml   | 106    | 22.94                 | 0.82                 | 3.80                   | 4.66               | 0.04                  | 27.37                  |

**Supplementary Table S3.** Physical and chemical parameters recorded by the CTD probe, nutrients concentration, DAPI counts, TC/TOC/TN concentration determined in the selected samples for CARD-FISH analysis (mxl: mixolimnion; cmc: chemocline; mml: monimolimnion).

|                                 | January              |                      |                      | February             |                      |                      | March                |                      |                      | April                |                      |                      | May                  |                      |                      | June                 |                      |                      |
|---------------------------------|----------------------|----------------------|----------------------|----------------------|----------------------|----------------------|----------------------|----------------------|----------------------|----------------------|----------------------|----------------------|----------------------|----------------------|----------------------|----------------------|----------------------|----------------------|
|                                 | <i>mxl</i>           | <i>cmc</i>           | <i>mml</i>           |
| Temperature (°C)                | 12.36                | 14.12                | 13.76                | 13.38                | 13.58                | 13.68                | 15.60                | 13.85                | 13.86                | 21.04                | 14.33                | 13.89                | 20.21                | 15.01                | 13.91                | 25.52                | 15.15                | 13.92                |
| Dissolved O <sub>2</sub> (mg/L) | 7.92                 | 2.43                 | 4.06                 | 8.05                 | 4.07                 | 1.68                 | 11.94                | 0.16                 | 0                    | 7.09                 | 0.18                 | 0                    | 8.32                 | 0.2                  | 0                    | 7.61                 | 0.10                 | 0                    |
| Red. Pot. (mV)                  | 161                  | 162                  | 162                  | 240                  | 242                  | 245                  | 119                  | 35                   | -181                 | 62                   | 16                   | -238                 | 43                   | 14                   | -240                 | 61                   | 5                    | -255                 |
| Chlorophyll (µg/L)              | 1.40                 | 0.70                 | 0.3                  | 0.5                  | 1.9                  | 0.3                  | 1                    | 0.9                  | 0.2                  | 1.2                  | 1.2                  | 0.3                  | 0.5                  | 3.6                  | 2.3                  | 3.3                  | 57.8                 | 1.5                  |
| pH                              | 8.60                 | 8.41                 | 8.51                 | 8.94                 | 8.76                 | 8.55                 | 9.07                 | 8.63                 | 8.39                 | 8.24                 | 7.97                 | 7.58                 | 8.49                 | 8.14                 | 7.7                  | 8.33                 | 7.98                 | 7.08                 |
| Salinity                        | 35.57                | 36.71                | 36.74                | 34.23                | 36.52                | 36.61                | 33.90                | 36.70                | 36.75                | 33.83                | 36.09                | 36.33                | 35.32                | 36.26                | 36.46                | 35.06                | 36.15                | 36.30                |
| DAPI (cells/mL)                 | 3.35×10 <sup>6</sup> | 3.68×10 <sup>6</sup> | 2.29×10 <sup>6</sup> | 2.90×10 <sup>6</sup> | 4.91×10 <sup>6</sup> | 3.06×10 <sup>6</sup> | 5.29×10 <sup>6</sup> | 8.20×10 <sup>6</sup> | 4.93×10 <sup>6</sup> | 2.33×10 <sup>6</sup> | 4.86×10 <sup>6</sup> | 3.94×10 <sup>6</sup> | 1.51×10 <sup>6</sup> | 1.43×10 <sup>6</sup> | 1.26×10 <sup>6</sup> | 5.36×10 <sup>6</sup> | 9.28×10 <sup>6</sup> | 7.33×10 <sup>6</sup> |
| Ammonia (µM)                    | 22.13                | 33.41                | 30.42                | 5.98                 | 22.70                | 29.46                | 1                    | 13.17                | 47.91                | 3.86                 | 31.09                | 78.85                | 13.87                | 12.10                | 56.27                | 4.02                 | 12.82                | 122.05               |
| Nitrites (µM)                   | 0.32                 | 0.75                 | 0.76                 | 0.35                 | 0.81                 | 1.12                 | 0.58                 | 2.43                 | 0                    | 0.15                 | 0.06                 | 0                    | 0.05                 | 0.04                 | 0                    | 0.19                 | 0.27                 | 0                    |
| Nitrates (µM)                   | 13.17                | 6.17                 | 5.63                 | 4.84                 | 10.68                | 5.16                 | 9.61                 | 3.60                 | 0                    | 8.43                 | 2.34                 | 0                    | 17.21                | 1.02                 | 0                    | 6.07                 | 2.22                 | 0                    |
| Phosphates (µM)                 | 1.70                 | 2.97                 | 3.03                 | 0.70                 | 2.14                 | 2.45                 | 0.45                 | 2.94                 | 10.39                | 0.56                 | 3.34                 | 8.49                 | 0.40                 | 1.71                 | 6.60                 | 0.04                 | 2.74                 | 12.61                |
| TC (mg/L)                       | 18.49                | 15.15                | 17.98                | 18.49                | 15.15                | 17.98                | 21.48                | 18.86                | 16.28                | 61.85                | 21.59                | 18.79                | 19.21                | 12.63                | 22.17                | 13.98                | 17.61                | 17.04                |
| TOC (mg/L)                      | 3.35                 | 3.11                 | 2.78                 | 3.35                 | 3.11                 | 2.78                 | 6.07                 | 3.84                 | 10.32                | 46.46                | 10.03                | 7.41                 | 8.842                | 8.501                | 6.02                 | 3.05                 | 3.25                 | 9.05                 |
| TN (mg/L)                       | 0.22                 | 0.37                 | 0.61                 | 0.22                 | 0.37                 | 0.61                 | 0.48                 | 0.23                 | 3.35                 | 2.51                 | 0.57                 | 1.75                 | 0.46                 | 0.277                | 0.723                | 0.31                 | 0.39                 | 2.32                 |
|                                 | July                 |                      |                      | August               |                      |                      | September            |                      |                      | October              |                      |                      | November             |                      |                      | December             |                      |                      |
|                                 | <i>mxl</i>           | <i>cmc</i>           | <i>mml</i>           |
| Temperature (°C)                | 27.21                | 15.21                | 13.94                | 27.63                | 15.65                | 13.95                | 22.41                | 16.92                | 13.83                | 17.42                | 13.94                | 13.86                | 16.19                | 17.43                | 14.53                | 14.55                | 14.03                | 13.71                |
| Dissolved O <sub>2</sub> (mg/L) | 7.05                 | 0.12                 | 0                    | 7.21                 | 0.08                 | 0                    | 6.36                 | 0.16                 | 0                    | 7.44                 | 0.50                 | 0                    | 6.88                 | 0.78                 | 0                    | 5.01                 | 1.85                 | 0                    |
| Red. Pot. (mV)                  | 46                   | 43                   | -290                 | 61                   | 12                   | -286                 | 87                   | 43                   | -280                 | 76                   | 14                   | -192                 | 300                  | 38                   | -185                 | 81                   | 53.15                | -231                 |
| Chlorophyll (µg/L)              | 1.7                  | 106.9                | 44.90                | 2.9                  | 41.7                 | 6.7                  | 1.7                  | 74.1                 | 10.6                 | 0.2                  | 1.1                  | 1                    | 2.9                  | 2.2                  | 14.5                 | 0.4                  | 21.8                 | 18.6                 |
| pH                              | 8.47                 | 8.14                 | 7.29                 | 8.53                 | 8.14                 | 6.66                 | 8.43                 | 8.24                 | 6.72                 | 8.97                 | 8.58                 | 8.28                 | 8.80                 | 8.89                 | 5.73                 | 8.81                 | 8.01                 | 7.80                 |
| Salinity                        | 36.07                | 36.12                | 36.22                | 37.27                | 35.79                | 35.98                | 36.60                | 35.92                | 35.91                | 34.37                | 36.59                | 36.69                | 36.35                | 37.55                | 37.72                | 37.32                | 36.09                | 35.80                |
| DAPI (cells/mL)                 | 5.19×10 <sup>6</sup> | 6.58×10 <sup>6</sup> | 3.56×10 <sup>6</sup> | 3.55×10 <sup>6</sup> | 7.14×10 <sup>6</sup> | 2.82×10 <sup>6</sup> | 3.13×10 <sup>6</sup> | 6.01×10 <sup>6</sup> | 2.89×10 <sup>6</sup> | 3.63×10 <sup>6</sup> | 4.90×10 <sup>6</sup> | 3.52×10 <sup>6</sup> | 2.79×10 <sup>6</sup> | 8.03×10 <sup>6</sup> | 4.17×10 <sup>6</sup> | 3.41×10 <sup>6</sup> | 7.02×10 <sup>6</sup> | 3.97×10 <sup>6</sup> |
| Ammonia (µM)                    | 3.45                 | 11.09                | 107.17               | 2.41                 | 15.85                | 126.84               | 4.64                 | 19.46                | 97.77                | 3.52                 | 31.66                | 46.04                | 8.55                 | 27.19                | 85.93                | 11.76                | 26.69                | 97.34                |
| Nitrites (µM)                   | 0.22                 | 0.22                 | 0                    | 0.07                 | 0.10                 | 0                    | 0.36                 | 0.20                 | 0                    | 0.20                 | 0.05                 | 0                    | 0.05                 | 0                    | 0                    | 0.13                 | 0.10                 | 0                    |
| Nitrates (µM)                   | 11.28                | 3.35                 | 0                    | 1.02                 | 1.15                 | 0                    | 5.53                 | 1.38                 | 0                    | 5.85                 | 2.50                 | 0                    | 23.03                | 0                    | 0                    | 18.47                | 7.38                 | 0                    |
| Phosphates (µM)                 | 0.48                 | 0.75                 | 13.68                | 0.10                 | 0.99                 | 15.82                | 0.1                  | 1.77                 | 19.87                | 0.35                 | 5.92                 | 6.34                 | 0.47                 | 2.63                 | 15.52                | 0.94                 | 2.44                 | 6.63                 |
| TC (mg/L)                       | 18.34                | 10.44                | 23.64                | 15.70                | 14.18                | 16.79                | 19.68                | 12.73                | 15.90                | 14.73                | 19.89                | 16.51                | 17.67                | 22.64                | 19.14                | 8.86                 | 13.99                | 14.52                |
| TOC (mg/L)                      | 4.07                 | 4.76                 | 15.40                | 2.78                 | 2.68                 | 2.59                 | 5.74                 | 6.97                 | 6.62                 | 6.31                 | 4.62                 | 5.67                 | 4.63                 | 4.63                 | 3.14                 | 1.40                 | 0.84                 | 1.28                 |
| TN (mg/L)                       | 0.43                 | 0.43                 | 3.67                 | 0.27                 | 0.29                 | 1.99                 | 0.78                 | 0.99                 | 2.68                 | 3.11                 | 3.41                 | 0.33                 | 0.24                 | 0.24                 | 0.29                 | 0.30                 | 0.32                 | 0.70                 |

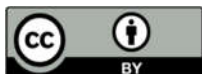

Supplement: s001 [file diversity-11-00037-s001.pdf]
